# Supplementary material for: Bottled Mineral Waters as Unconventional Sampling in Hydro-Geological Research
Source: MDPI journal article supplement (doi:10.3390/w15193466), 2023-09-30
Supplement: s1 [file s1]

## Supplementary material

**Table S1a:** Bottled waters considered in this paper (code number; brand name; location; isotopic composition in oxygen and deuterium; reference).

| No | Brand name    | Location                  | $\delta^{18}\text{O}$ (‰)<br>SMOW | $\delta\text{D}$ (‰)<br>SMOW | Reference                 |
|----|---------------|---------------------------|-----------------------------------|------------------------------|---------------------------|
| 1  | Sangemini     | San Gemini (TR)           | -6.9                              | -46                          | Raco <i>et al.</i> , 2013 |
| 2  | Sant'Anna     | Vinadio (CN)              | -12.9                             | -94                          |                           |
| 3  | Frasassi      | Genga (AN)                | -8.5                              | -58                          |                           |
| 4  | Norda         | Primaluna (LC)            | -9.2                              | -64                          |                           |
| 5  | Lilia         | Rionero in Vulture (PZ)   | -9.6                              | -62                          |                           |
| 6  | Acqua Panna   | Scarpiera (FI)            | -7.9                              | -53                          |                           |
| 7  | Toka          | Monticchio Bagni (PZ)     | -8.3                              | -54                          |                           |
| 8  | Acqua Conad   | Cervarezza Terme (RE)     | -9.8                              | -67                          |                           |
| 9  | Ferrarelle    | Riardo (CE)               | -6.8                              | -44                          |                           |
| 10 | Guizza        | Scorzè (VE)               | -8.8                              | -63                          |                           |
| 11 | Fonte Aretina | Monte San Savino (AR)     | -7.5                              | -49                          |                           |
| 12 | Lete          | Pratella (CE)             | -6.6                              | -40                          |                           |
| 13 | Fiuggi        | Fiuggi (FR)               | -7.3                              | -47                          |                           |
| 14 | S. Pellegrino | San Pellegrino Terme (BG) | -9.1                              | -64                          |                           |
| 15 | Montecimone   | Fanano (MO)               | -9.4                              | -67                          |                           |
| 16 | San Benedetto | Scorzè (VE)               | -8.4                              | -59                          |                           |
| 17 | Levissima     | Valdisotto (SO)           | -11.4                             | -84                          |                           |
| 18 | Santafiora    | Monte San Savino (AR)     | -7.4                              | -49                          |                           |
| 19 | Vera          | San Giorgio in Bosco (PD) | -8.6                              | -60                          |                           |
| 20 | Lieve         | Gubbio (PG)               | -8.3                              | -53                          |                           |
| 21 | Fonte Ilaria  | Pescaglia (LU)            | -6.5                              | -42                          |                           |
| 22 | San Carlo     | Massa (MS)                | -6.8                              | -45                          |                           |
| 23 | San Francesco | Cadorago (CO)             | -8.9                              | -64                          |                           |
| 24 | Vitasnella    | Darfo Boario Terme (BS)   | -8.7                              | -59                          |                           |
| 25 | Uliveto       | Vicopisano (PI)           | -6.3                              | -39                          |                           |
| 26 | Fonte Bianca  | Pracchia (PT)             | -7.9                              | -52                          |                           |
| 27 | Bedonia       | Bedonia (PR)              | -8.7                              | -59                          |                           |
| 28 | Acqua Silva   | Pracchia (PT)             | -7.9                              | -54                          |                           |
| 29 | Amorosa       | Massa (MS)                | -6.9                              | -49                          |                           |
| 30 | Felicia       | Monticchio Bagni (PZ)     | -9.4                              | -61                          |                           |

|    |                     |                              |       |        |                                  |
|----|---------------------|------------------------------|-------|--------|----------------------------------|
| 31 | Tesorino            | Montopoli in Val D'Arno (PI) | -6.5  | -42    |                                  |
| 32 | Rocchetta           | Gualdo Tadino (PG)           | -9    | -60    |                                  |
| 33 | Valmora             | Luserna (TO)                 | -11.1 | -80    |                                  |
| 34 | Paradiso            | Pocenia (UD)                 | -8.4  | -59    |                                  |
| 35 | Claudia             | Sabazia (RM)                 | -5.5  | -36    |                                  |
| 36 | Neve                | Cadorago (CO)                | -8.6  | -60    |                                  |
| 37 | S. Bernardo         | Garessio (CN)                | -10.8 | -76    |                                  |
| 38 | Perla               | Monte San Savino (AR)        | -7.5  | -49    |                                  |
| 39 | Monteverde          | Pracchia (PT)                | -8.1  | -55    |                                  |
| 40 | Gaudianello         | Melfi (PZ)                   | -9.4  | -61    |                                  |
| 41 | Effevisa            | San Gemini (TR)              | -7.1  | -47    |                                  |
| 42 | Azzurra             | Torrebelvicino (VI)          | -9.1  | -63    |                                  |
| 43 | Mont Blanc          | Morgex (AO)                  | -13.8 | -99    |                                  |
| 44 | Goccia Viva         | Pescaglia (LU)               | -6.6  | -45    |                                  |
| 45 | Dolomiti            | Valli del Pasubio (VI)       | -9.6  | -67    |                                  |
| 46 | Acqua di Nepi       | Nepi (VT)                    | -6.4  | -41    |                                  |
| 47 | Fonte S. Vittoria   | Villa (IM)                   | -9.8  | -69    |                                  |
| 48 | Sparea              | Luserna (TO)                 | -11.1 | -77    |                                  |
| 49 | Azzurrina           | Careggine (LU)               | -8.3  | -54    |                                  |
| 50 | Alpi Cozie          | Luserna (TO)                 | -11.6 | -82    |                                  |
| 51 | Balda               | Bagolino (BS)                | -9.5  | -66    |                                  |
| 52 | Lynx                | Bedonia (PR)                 | -8.9  | -62    |                                  |
| 53 | Guizza              | Scorzè (VE)                  | -8.15 | -58    | Brencic and Vrenca,<br>2006      |
| 54 | Spar Sorgente Linda | Salò (BS)                    | -7.85 | -55    |                                  |
| 55 | Primula             | Spinone al Lago (BG)         | -8    | -54    |                                  |
| 56 | San Antonio         | Cadorago (CO)                | -8.4  | -56    |                                  |
| 57 | Primula             | Spinone al Lago (BG)         | -7.8  | -51    |                                  |
| 58 | Guizza Silles       | Scorzè (VE)                  | -8.2  | -57    |                                  |
| 59 | San Antonio         | Cadorago (CO)                | -8.5  | -55    |                                  |
| 60 | Zaros               | Heraklion                    | -7.88 | -50.33 | Dotsika <sup>et al.</sup> , 2010 |
| 61 | Nera Kritis         | Varipetro Therisso<br>Chania | -8.7  | -51.84 |                                  |
| 62 | Avra                | Avra, Aegion                 | -8.22 | -49.87 |                                  |
| 63 | Rioba               | Rododafni, Aegion            | -7.98 | -51.33 |                                  |
| 64 | Krinea              | Kalians, Korinthias          | -9.08 | -61.5  |                                  |
| 65 | Yas                 | Kalians, Korinthias          | -9.02 | -60.1  |                                  |
| 66 | Loutraki Provis     | Loutraki                     | -7.66 | -50.49 |                                  |
| 67 | Loutraki Ivi        | Loutraki                     | -6.9  | -46.46 |                                  |
| 68 | Sariza              | Andros Island                | -8.06 | -50.05 |                                  |
| 69 | Korpi               | Monastiraki, Vonitsa         | -7.49 | -55.62 |                                  |

|     |                   |                                   |        |        |                              |
|-----|-------------------|-----------------------------------|--------|--------|------------------------------|
| 70  | Ioli              | Moschochori, Fthiotida            | -9.25  | -61.7  |                              |
| 71  | Evdoro            | Mexiatai, Yptai, Fthiotida        | -9.77  | -67.47 |                              |
| 72  | Velouchi          | Velouchi, Evritania               | -9.88  | -67.16 |                              |
| 73  | Vikos             | Ioannina                          | -7.86  | -52.19 |                              |
| 74  | Zagorochoria      | Ioannina                          | -8.07  | -54.08 |                              |
| 75  | Zagori            | Kranoula, Ioannina                | -8.19  | -51.92 |                              |
| 76  | Eviva             | Ioannina                          | -8.19  | -52.86 |                              |
| 77  | Marara            | Zagorochoria, Ioannina            | -7.9   | -52.75 |                              |
| 78  | Physiko Nero AB   | Ioannina                          | -8.16  | -52.31 |                              |
| 79  | Mitsikeli         | Ioannina                          | -8.07  | -53.48 |                              |
| 80  | Ydor Sourotis     | Souroti, Thessaloniki             | -7.82  | -51.19 |                              |
| 81  | Daly Drink Water  | Souroti, Thessaloniki             | -7.78  | -52.27 |                              |
| 82  | Drossia           | Drosia, Edessa                    | -9.12  | -61.2  |                              |
| 83  | Athos             | Akonorachi, Poligiros, Chalkidiki | -8.16  | -54.6  |                              |
| 84  | Pigi Paikou       | Axioupolis, Kilkis                | -9.1   | -62.53 | Brencic <i>et al.</i> , 2010 |
| 85  | Donat Mg          | Podplat                           | -11.9  | -77    |                              |
| 86  | Donat Mg          | Podplat                           | -11.95 | -78    |                              |
| 87  | Tempel            | Rogaska Slatina                   | -10.5  | -71    |                              |
| 88  | Tempel            | Rogaska Slatina                   | -10.4  | -70    |                              |
| 89  | Edina             | Rogaska Slatina                   | -10.45 | -71    |                              |
| 90  | Classic           | Radenci                           | -10.7  | -74    |                              |
| 91  | Classic           | Radenci                           | -10.65 | -75    |                              |
| 92  | Light Miral       | Radenci                           | -11.35 | -81    |                              |
| 93  | Stirna            | Kranj                             | -9.35  | -62    |                              |
| 94  | Stirna            | Kranj                             | -9.35  | -61    |                              |
| 95  | Radin             | Radenci                           | -9.9   | -72    |                              |
| 96  | Radin             | Radenci                           | -9.95  | -70    |                              |
| 97  | Izvir             | Radenci                           | -9.85  | -69    |                              |
| 98  | Iva               | Radenci                           | -9.35  | -67    |                              |
| 99  | Iva               | Radenci                           | -9.45  | -66    |                              |
| 100 | Iva               | Radenci                           | -9.45  | -67    |                              |
| 101 | Bistra            | Brezice                           | -9.45  | -66    |                              |
| 102 | Dana              | Mirna                             | -9.35  | -65    |                              |
| 103 | H2O               | Ajdovscina                        | -7.5   | -46    |                              |
| 104 | Juliana           | Trzic                             | -10.5  | -71    |                              |
| 105 | Oda               | Lasko                             | -9.65  | -66    |                              |
| 106 | Oda               | Lasko                             | -9.7   | -66    |                              |
| 107 | Spar spring water | Radomlje                          | -8.6   | -59    |                              |
| 108 | Spar spring water | Radomlje                          | -8.6   | -60    |                              |

|     |                   |                 |        |       |                              |
|-----|-------------------|-----------------|--------|-------|------------------------------|
| 109 | Spar spring water | Radomlje        | -8.65  | -60   |                              |
| 110 | Spar table water  | Radomlje        | -8.65  | -59.5 |                              |
| 111 | Ziva              | Radomlje        | -8.6   | -57   |                              |
| 112 | Zala              | Lubiana         | -8.9   | -61   |                              |
| 113 | Zala              | Lubiana         | -8.95  | -60   |                              |
| 114 | Tiha              | Rogaska Slatina | -10.4  | -72   |                              |
| 115 | Naturelle         | Radenci         | -9.27  | -65.5 | Zuliani <i>et al.</i> , 2020 |
| 116 | Dana              | Mirna           | -9.00  | -62.6 |                              |
| 117 | Zala              | Lubiana         | -8.61  | -58.0 |                              |
| 118 | Julijana          | Trzic           | -9.06  | -61.3 |                              |
| 119 | Oda               | Lasko           | -9.44  | -63.8 |                              |
| 120 | Kaplja            | Radomlje        | -8.32  | -56.6 |                              |
| 121 | Voda 902          | Stahovica       | -9.14  | -59.7 |                              |
| 122 | Costella          | Kostel          | -8.93  | -60.2 |                              |
| 123 | Sicheldorfer      | Bad Radkersburg | -10.7  | -78   | Brencic and Vrenca, 2006     |
| 124 | Long Life-2       | Bad Radkersburg | -11.55 | -83   |                              |
| 125 | Long Life-1       | Bad Radkersburg | -11.6  | -79   |                              |
| 126 | Römerquelle       | Edelstal        | -10.84 | -77.9 | Zuliani <i>et al.</i> , 2020 |
| 127 | Jamnica           | Pisarovina      | -9.55  | -69   | Brencic and Vrenca, 2006     |
| 128 | Jamnica           | Pisarovina      | -9.5   | -69   |                              |
| 129 | Jana              | Pisarovina      | -10.75 | -75   |                              |
| 130 | Jana              | Pisarovina      | -10.42 | -70.7 | Zuliani <i>et al.</i> , 2020 |
| 131 | Evian             | Evian-les-Bains | -10.2  | -74   | Brencic and Vrenca, 2006     |
| 132 | Laqueuille        | Laqueuille      | -8.58  | -57.6 | Zuliani <i>et al.</i> , 2020 |
| 133 | Evian             | Evian-les-Bains | -9.97  | -71.3 |                              |

**Table S1b:** Bottled water: sampling information.

| References              | Sampling data/information                                                                                                 |
|-------------------------|---------------------------------------------------------------------------------------------------------------------------|
| Brencic and Vreca, 2006 | September, 2004                                                                                                           |
| Brencic et al., 2010    | September, 2004 (first campaign; n=35 samples Brencic and Vreca, 2005);<br>January, 2008 (second sampling campaign; n=16) |
| Dotsika et al., 2010    | analyzed bottled waters available on the Greek market in 2009                                                             |
| Raco et al., 2013       | analyzed bottled waters available on the Italian market in 2010                                                           |
| Zuliani et al., 2020    | analyzed bottled waters available on the Slovenia in 2016                                                                 |

**Table S2:** Chemical composition of the bottled waters considered in the present paper (code, brand name, elevation, physical and chemical composition).

| No | Brand name    | Water type | Location                  | Elev.<br>m a.s.l. | T<br>(°C) | pH  | EC<br>(µS/cm) | Na<br>(mg/L) | K<br>(mg/L) | Ca<br>(mg/L) | Mg<br>(mg/L) | HCO <sub>3</sub><br>(mg/L) | SO <sub>4</sub><br>(mg/L) | Cl<br>(mg/L) | SiO <sub>2</sub><br>(mg/L) |
|----|---------------|------------|---------------------------|-------------------|-----------|-----|---------------|--------------|-------------|--------------|--------------|----------------------------|---------------------------|--------------|----------------------------|
| 1  | Sangemini     | Still      | San Gemini (TR)           | 355               | 15,4      | 6,4 | 1376          | 20           | 4           | 333          | 18           | 996                        | 60                        | 17           | 33                         |
| 2  | Sant'Anna     | Still      | Vinadio (CN)              | 901               | 7,3       | 6,5 | 22            | 2            |             | 2            |              | 6                          | 3                         |              | 10                         |
| 3  | Frasassi      | Still      | Genga (AN)                | 235               | 13,5      | 7,4 | 522           | 20           | 2           | 98           | 4            | 298                        | 23                        | 20           | 11                         |
| 4  | Norda         | Still      | Primaluna (LC)            | 577               | 11        | 7,2 | 81            | 2            | 1           | 11           | 3            | 44                         | 6                         | 1            | 9                          |
| 5  | Lilia         | Still      | Rionero in Vulture (PZ)   | 328               | 17,8      | 6,3 | 468           | 45           | 29          | 34           | 10           | 268                        | 33                        | 9            | 85                         |
| 6  | Acqua Panna   | Still      | Scarpiera (FI)            | 585               | 9,9       | 7,9 | 223           | 6            | 1           | 33           | 6            | 106                        | 21                        | 9            | 7                          |
| 7  | Toka          | Sparkling  | Monticchio Bagni (PZ)     | 393               | 15,4      | 6,2 | 2745          |              | 102         | 242          | 52           | 1704                       | 328                       | 92           | 85                         |
| 8  | Acqua Conad   | Still      | Cervarezza Terme (RE)     | 875               | 7,7       | 7,8 | 250           | 10           | 0           | 41           | 5            | 135                        | 31                        |              |                            |
| 9  | Ferrarelle    | Sparkling  | Riardo (CE)               | 113               | 18        | 6,1 | 1810          | 50           | 52          | 365          | 18           | 1403                       | 3                         | 20           | 86                         |
| 10 | Guizza        | Still      | Scorzè (VE)               | 16                | 15        | 7,4 | 421           | 6            | 1           | 50           | 29           | 308                        | 4                         | 2            | 14                         |
| 11 | Fonte Aretina | Still      | Monte San Savino (AR)     | 266               | 20,9      | 7,4 | 1090          | 106          | 3           | 65           | 30           | 390                        | 58                        | 115          | 21                         |
| 12 | Lete          | Sparkling  | Pratella (CE)             | 162               | 15        | 6,2 | 1280          | 5            | 2           | 314          | 14           | 980                        | 6                         | 9            | 18                         |
| 13 | Fiuggi        | Still      | Fiuggi (FR)               | 573               | 18        | 7,6 | 158           | 7            | 7           | 17           | 6            | 98                         | 3                         | 7            | 30                         |
| 14 | S. Pellegrino | Still      | San Pellegrino Terme (BG) | 362               | 22,6      | 7,3 | 1149          | 34           | 7           | 179          | 52           | 239                        | 445                       | 55           | 8                          |
| 15 | Montecimone   | Still      | Fanano (MO)               | 912               | 7         | 7,7 | 195           | 3            | 1           | 33           | 5            | 125                        | 10                        | 3            | 4                          |
| 16 | San Benedetto | Still      | Scorzè (VE)               | 16                | 15,1      | 7,5 | 419           | 6            | 1           | 50           | 29           | 311                        | 4                         | 2            | 13                         |
| 17 | Levissima     | Still      | Valdisotto (SO)           | 1151              | 5,9       | 7,8 | 124           | 2            | 2           | 21           | 2            | 57                         | 17                        | 0            | 6                          |
| 18 | Santafiora    | Still      | Monte San Savino (AR)     | 266               | 20,9      | 7,4 | 1090          | 106          | 3           | 65           | 30           | 390                        | 58                        | 115          | 21                         |
| 19 | Vera          | Still      | San Giorgio in Bosco (PD) | 27                | 13,3      | 8   | 248           | 2            | 1           | 36           | 13           | 148                        | 19                        | 3            | 9                          |
| 20 | Lieve         | Still      | Gubbio (PG)               | 418               | 11,6      | 7,7 | 480           | 15           | 2           | 65           | 17           | 257                        | 51                        | 10           | 10                         |
| 21 | Fonte Ilaria  | Still      | Pescaglia (LU)            | 90                | 16        | 7,6 | 373           | 12           | 1           | 71           | 6            | 211                        | 11                        | 18           | 11                         |
| 22 | San Carlo     | Still      | Massa (MS)                | 305               | 12,8      | 5,7 | 76            | 9            | 0           | 2            | 3            | 12                         | 2                         | 13           | 9                          |

|    |                   |           |                              |     |      |     |      |     |    |     |    |      |     |     |     |
|----|-------------------|-----------|------------------------------|-----|------|-----|------|-----|----|-----|----|------|-----|-----|-----|
| 23 | San Francesco     | Still     | Cadorago (CO)                | 295 | 13,7 | 7,8 | 210  | 4   | 1  | 34  | 6  | 131  | 1   | 2   | 15  |
| 24 | Vitasnella        | Still     | Darfo Boario Terme (BS)      | 263 | 12   | 7,4 | 547  | 3   | 1  | 85  | 28 | 305  | 87  | 2   | 10  |
| 25 | Uliveto           | Sparkling | Vicopisano (PI)              | 11  | 24   | 5,8 | 1123 | 74  | 8  | 171 | 28 | 574  | 104 | 79  | 11  |
| 26 | Fonte Bianca      | Sparkling | Pracchia (PT)                | 624 | 12,6 | 8   | 245  | 14  | 1  | 33  | 10 | 139  | 27  | 7   | 8   |
| 27 | Bedonia           | Still     | Bedonia (PR)                 | 761 | 9,5  | 7,6 | 358  | 6   | 1  | 64  | 9  | 230  | 22  | 5   | 8   |
| 28 | Acqua Silva       | Still     | Pracchia (PT)                | 624 | 11,7 | 8   | 228  | 5   | 1  | 31  | 12 | 113  | 36  | 6   | 9   |
| 29 | Amorosa           | Still     | Massa (MS)                   | 167 | 10   | 5,2 | 32   | 5   | 0  | 1   | 1  | 4    | 1   | 8   | 5   |
| 30 | Felicia           | Sparkling | Monticchio Bagni (PZ)        | 393 | 19   | 6,2 | 1495 | 173 | 40 | 150 | 54 | 866  | 129 | 36  | 85  |
| 31 | Tesorino          | Still     | Montopoli in Val D'Arno (PI) | 42  | 14   | 7,1 | 860  | 36  | 2  | 128 | 26 | 329  | 157 | 40  | 13  |
| 32 | Rocchetta         | Still     | Gualdo Tadino (PG)           | 506 | 11,3 | 7,5 | 279  | 5   | 1  | 57  | 3  | 180  | 8   | 8   | 5   |
| 33 | Valmora           | Still     | Luserna (TO)                 | 501 | 6,3  | 8   | 65   | 1   | 1  | 2   | 3  | 15   | 5   | 0   | 6   |
| 34 | Paradiso          | Still     | Pocenia (UD)                 | 11  | 14,6 | 7,5 | 507  | 3   | 1  | 73  | 28 | 274  | 61  | 4   |     |
| 35 | Claudia           | Sparkling | Sabazia (RM)                 | 158 | 22,3 | 5,7 | 844  | 56  | 69 | 86  | 21 | 484  | 41  | 51  | 93  |
| 36 | Neve              | Still     | Cadorago (CO)                | 295 | 14,8 | 7,7 | 202  | 4   | 1  | 34  | 6  | 137  | 2   | 1   | 16  |
| 37 | S. Bernardo       | Still     | Garessio (CN)                | 591 | 6,5  | 7   | 51   | 1   | 1  | 10  | 1  | 30   | 2   | 1   | 4   |
| 38 | Perla             | Still     | Monte San Savino (AR)        | 266 | 20,1 | 7,4 | 1085 | 112 | 2  | 70  | 33 | 395  | 64  | 120 | 20  |
| 39 | Monteverde        | Still     | Pracchia (PT)                | 624 | 12,6 | 8   | 254  | 14  | 1  | 33  | 10 | 139  | 27  | 7   | 8   |
| 40 | Gaudianello       | Sparkling | Melfi (PZ)                   | 554 | 18,5 | 5,8 | 1432 | 130 | 50 | 152 | 54 | 920  | 118 | 38  | 110 |
| 41 | Effeviva          | Sparkling | San Gemini (TR)              | 355 | 15,8 | 6,2 | 1635 | 10  | 2  | 428 | 5  | 1252 |     |     | 14  |
| 42 | Azzurra           | Still     | Torrebelvicino (VI)          | 269 | 15,6 | 7,7 | 620  | 1   | 1  | 102 | 37 | 232  | 195 |     |     |
| 43 | Mont Blanc        | Still     | Morgex (AO)                  | 938 | 6,1  | 7,7 | 171  | 1   | 2  | 30  | 2  | 62   | 37  |     |     |
| 44 | Goccia Viva       | Still     | Pescaglia (LU)               | 90  | 16   | 7,6 | 373  | 12  | 1  | 71  | 6  | 211  | 11  | 18  | 11  |
| 45 | Dolomiti          | Still     | Valli del Pasubio (VI)       | 352 | 6,1  | 8,2 | 172  | 1   | 1  | 24  | 8  | 88   | 20  | 1   | 8   |
| 46 | Acqua di Nepi     | Sparkling | Nepi (VT)                    | 174 | 17,4 | 5,8 | 779  | 28  | 50 | 82  | 27 | 451  | 38  | 20  | 98  |
| 47 | Fonte S. Vittoria | Still     | Villa (IM)                   | 592 | 7    | 7,9 | 320  | 2   | 0  | 53  | 8  | 175  | 23  | 1   | 6   |
| 48 | Sparea            | Still     | Luserna (TO)                 | 501 | 11,6 | 6,8 | 30   | 2   | 0  | 3   | 1  | 13   | 4   | 1   |     |

|    |                  |                      |                           |      |      |      |       |      |    |       |       |      |       |       |    |
|----|------------------|----------------------|---------------------------|------|------|------|-------|------|----|-------|-------|------|-------|-------|----|
| 49 | Azzurrina        | Still                | Careggine (LU)            | 788  | 9    | 8,2  | 80    | 4    | 0  | 14    | 1     | 49   | 2     | 5     | 6  |
| 50 | Alpi Cozie       | Still                | Luserna (TO)              | 501  | 8,6  | 6,9  | 39    | 2    | 1  | 6     | 1     | 21   | 4     | 2     |    |
| 51 | Balda            | Still                | Bagolino (BS)             | 721  | 9    | 8,1  | 186   | 3    | 1  | 28    | 6     | 95   | 16    | 4     |    |
| 52 | Lynx             | Still                | Bedonia (PR)              | 761  | 7,7  | 7,8  | 261   | 3    | 0  | 53    | 5     | 180  | 9     | 4     | 5  |
| 60 | Zaros            |                      | Heraklion                 | 326  | 16,6 | 7,9  | 261   | 7    | 1  | 30    | 11    | 137  | 5     | 14    | 3  |
| 61 | Nera Kritis      |                      | Varipetro Therisso Chania | 649  |      | 7,68 | 255   | 7    |    | 34,6  | 4,7   | 149  | 7,5   | 10,3  |    |
| 62 | Avra             |                      | Avra, Aegion              | 464  | 17   |      | 396   | 10   | 1  | 68    | 7     | 223  | 16    | 11    |    |
| 65 | Yas              |                      | Kaliani, Korinthias       | 662  |      | 7,5  | 545   | 5    | 4  | 107   | 4,7   | 337  | 10,7  | 5     |    |
| 66 | Loutraki Provis  |                      | Loutraki                  | 670  | 16,9 |      | 652   | 16   |    | 74,4  | 12    | 372  | 6,7   | 39,2  |    |
| 67 | Loutraki Ivi     |                      | Loutraki                  | 610  | 20   |      | 630   |      |    |       |       | 353  |       |       |    |
| 69 | Korpi            |                      | Monastiraki, Vonitsa      | 302  | 16,3 |      | 509   | 6    |    | 96,39 | 2,56  | 272  | 9,03  | 11,51 |    |
| 70 | Ioli             |                      | Moschochori, Fthiotida    | 11   | 17   | 8,04 | 391   | 7    |    | 42,12 | 11,26 | 268  | 12,6  | 7,51  |    |
| 73 | Vikos            |                      | Ioannina                  | 562  |      | 7,4  | 480   | 3    | 1  | 100   | 2     | 281  | 13    | 8     |    |
| 74 | Zagorochoria     |                      | Ioannina                  | 562  |      |      |       |      |    |       |       |      |       |       |    |
| 75 | Zagori           |                      | Kranoula, Ioannina        | 611  | 17,6 | 7,8  | 406   | 3    | 1  | 82    | 3     | 244  | 12,6  | 3     |    |
| 79 | Mitsikeli        |                      | Ioannina                  | 1389 |      | 7,9  |       | 2    | 1  | 70    | 1     | 210  |       | 5     |    |
| 80 | Ydor Sourotis    |                      | Souroti, Thessaloniki     | 123  | 16,8 | 7,54 | 690   | 23   |    | 43,01 | 56,33 | 380  | 14,68 | 24,8  |    |
| 81 | Daly Drink Water |                      | Souroti, Thessaloniki     | 123  |      |      |       |      |    |       |       |      |       |       |    |
| 85 | Donat Mg         | Sparkling natural    | Podplat                   | 245  |      | 6,4  | 10100 | 1560 | 17 | 94    | 2020  | 6951 | 2270  | 55    | 71 |
| 86 | Donat Mg         | Sparkling natural    | Podplat                   | 245  |      | 6,5  | 10100 | 1560 | 12 | 25    | 1020  | 7066 | 2220  | 55    | 61 |
| 87 | Tempel           | Sparkling natural    | Rogaska Slatina           | 225  |      | 5,5  | 1400  | 140  | 2  | 119   | 128   | 822  | 188   | 5     | 7  |
| 88 | Tempel           | Sparkling natural    | Rogaska Slatina           | 225  |      | 5,5  | 1400  | 140  | 2  | 118   | 128   | 823  | 173   | 6     | 7  |
| 89 | Edina            | Sparkling natural    | Rogaska Slatina           | 225  |      | 5,2  | 1075  | 63   | 1  | 85    | 79    | 644  | 111   | 4     | 3  |
| 90 | Classic          | Sparkling natural    | Radenci                   | 210  |      | 6    | 3130  | 433  | 95 | 19    | 113   | 2134 | 95    | 47    | 33 |
| 91 | Classic          | Sparkling natural    | Radenci                   | 210  |      | 6,1  | 3080  | 369  | 94 | 63    | 131   | 2185 | 77    | 42    | 38 |
| 93 | Stirna           | Sparkling artificial | Kranj                     | 384  |      | 5    | 435   | 3    | 1  | 54    | 11    | 209  | 20    | 7     |    |

|     |                   |                       |                 |     |  |     |      |     |    |     |    |     |    |    |      |
|-----|-------------------|-----------------------|-----------------|-----|--|-----|------|-----|----|-----|----|-----|----|----|------|
| 94  | Stirna            | Sparkling artificial  | Kranj           | 384 |  | 5   | 435  | 3   | 1  | 58  | 12 | 232 | 20 | 6  |      |
| 95  | Radin             | Still                 | Radenci         | 210 |  | 7,3 | 1080 | 126 | 17 | 133 | 45 | 712 | 7  | 17 | 18   |
| 96  | Radin             | Still                 | Radenci         | 210 |  | 7,3 | 1080 | 127 | 18 | 136 | 45 | 723 | 7  | 17 | 19   |
| 97  | Izvir             | Still                 | Radenci         | 210 |  | 6,9 | 555  | 7   | 1  | 73  | 28 | 373 | 3  | 6  | 14   |
| 98  | Iva               | Still                 | Radenci         | 210 |  | 6,6 | 526  | 8   | 2  | 66  | 26 | 271 | 8  | 30 | 12   |
| 99  | Iva               | Still                 | Radenci         | 210 |  | 6,6 | 527  | 7   | 2  | 66  | 27 | 278 | 8  | 31 | 9    |
| 100 | Iva               | Still                 | Radenci         | 210 |  | 6,6 | 527  | 9   | 2  | 67  | 27 | 391 | 11 | 30 | 14   |
| 101 | Bistra            | Still                 | Brezice         | 160 |  | 7,4 | 373  | 10  | 1  | 73  | 14 | 246 | 3  | 2  | 12   |
| 102 | Dana              | Still                 | Mirna           | 245 |  | 7,2 | 586  | 2   | 1  | 93  | 47 | 275 | 9  | 2  | 4    |
| 103 | H2O               | Still                 | Ajdovscina      | 100 |  | 7,8 | 322  | 3   | 0  | 39  | 19 | 194 | 7  | 6  |      |
| 104 | Juliana           | Still                 | Trzic           | 482 |  | 7,8 | 309  | 1   | 0  | 43  | 15 | 190 | 11 | 1  | 0    |
| 105 | Oda               | Still                 | Lasko           | 227 |  | 7,6 | 460  | 1   | 0  | 56  | 31 | 289 | 17 | 9  | 1    |
| 106 | Oda               | Still                 | Lasko           | 227 |  | 7,7 | 458  | 1   | 0  | 55  | 30 | 292 | 17 | 1  | 1    |
| 107 | Spar spring water | Still                 | Radomlje        | 344 |  | 7,8 | 265  | 2   | 0  | 33  | 11 | 171 | 2  | 1  | 5    |
| 108 | Spar spring water | Still                 | Radomlje        | 344 |  | 7,8 | 265  | 0   | 0  | 34  | 11 | 174 | 2  | 1  | 5    |
| 109 | Spar spring water | Still                 | Radomlje        | 344 |  | 7,8 | 265  | 2   | 0  | 34  | 12 | 176 | 3  | 1  | 5    |
| 110 | Spar table water  | Still                 | Radomlje        | 344 |  | 7,7 | 264  | 2   | 0  | 33  | 13 | 179 | 3  | 1  | 6    |
| 111 | Ziva              | Still                 | Radomlje        | 344 |  | 7,7 | 263  | 2   | 0  | 33  | 14 | 177 | 3  | 1  | 6    |
| 112 | Zala              | Still                 | Lubiana         | 298 |  | 7,4 | 515  | 9   | 1  | 69  | 16 | 274 | 17 | 21 | 3    |
| 113 | Zala              | Still                 | Lubiana         | 298 |  | 7,4 | 515  | 10  | 1  | 68  | 17 | 268 | 17 | 22 | 3    |
| 114 | Tiha              | Still                 | Rogaska Slatina | 225 |  | 7,3 | 576  | 1   | 0  | 75  | 34 | 379 | 18 | 2  | 1    |
| 115 | Naturelle         | Natural mineral water | Radenci         | 210 |  | 7,3 |      | 8   | 1  | 61  | 21 | 280 | <1 | 4  | 27   |
| 116 | Dana              | Natural mineral water | Mirna           | 245 |  | 7,7 |      | 2   | 1  | 66  | 33 | 372 | 15 | 6  | n.d. |
| 117 | Zala              | Spring water          | Lubiana         | 298 |  | 7,7 |      | 4   | 0  | 62  | 19 | 250 | 14 | 14 | 2    |
| 118 | Julijana          | Spring water          | Trzic           | 482 |  | 7,9 |      | 8   | 1  | 53  | 17 | 210 | 29 | 13 | n.d. |
| 119 | Oda               | Spring water          | Lasko           | 227 |  | 8,0 |      | <1  | 0  | 51  | 26 | 280 | 14 | 5  | n.d. |

|     |              |                       |                 |     |  |      |      |      |       |     |     |      |      |     |      |
|-----|--------------|-----------------------|-----------------|-----|--|------|------|------|-------|-----|-----|------|------|-----|------|
| 120 | Kaplja       | Natural mineral water | Radomlje        | 344 |  | 7,9  |      | 2    | 0     | 34  | 15  | 180  | 4    | 2   | n.d. |
| 121 | Voda 902     | Spring water          | Stahovica       | 902 |  | 7,5  |      | 1    | 0     | 7   | 2   | 24   | 11   | 1   | n.d. |
| 122 | Costella     | Natural mineral water | Kostel          | 258 |  | 7,3  |      | 1    | 0     | 57  | 31  | 343  | 6    | 2   | n.d. |
| 123 | Sicheldorfer | Sparkling natural     | Bad Radkersburg | 203 |  | 6,1  | 5480 | 1110 | 130   | 10  | 102 | 3285 | 2    | 462 | 32,6 |
| 124 | Long Life-2  | Sparkling natural     | Bad Radkersburg | 204 |  | 5,8  | 2650 | 124  | 6,87  | 37  | 199 | 2049 | 2    | 37  | 27,7 |
| 125 | Long Life-1  | Sparkling artificial  | Bad Radkersburg | 204 |  | 5,9  | 2690 | 90,3 | 6,55  | 217 | 157 | 2060 | 2    | 38  | 26,6 |
| 126 | Römerquelle  | Natural mineral water | Edelstal        | 177 |  | 7,42 |      | 16   | 2     | 132 | 63  | 413  | 267  | 5   | n.d. |
| 127 | Jamnica      | Sparkling artificial  | Pisarovina      | 136 |  | 6    | 3680 | 753  | 32,2  | 139 | 50  | 2073 | 130  | 257 | 8,44 |
| 128 | Jamnica      | Sparkling artificial  | Pisarovina      | 136 |  | 6    | 3680 | 729  | 32,7  | 139 | 52  | 2097 | 120  | 249 | 8,72 |
| 129 | Jana         | Still                 | Pisarovina      | 136 |  | 7,4  | 507  | 1,26 | 0,524 | 64  | 36  | 350  | 5    | 1   | 1,81 |
| 130 | Jana         | Natural mineral water | Pisarovina      | 136 |  | 7,68 |      | 2    | 1     | 64  | 32  | 372  | 6    | 3   | n.d. |
| 131 | Evian        | Still                 | Evian-les-Bains | 376 |  |      |      |      |       |     |     |      |      |     |      |
| 132 | Laqueuille   | Spring water          | Laqueuille      | 898 |  | 7,22 |      | 5,9  | 2,8   | 4,7 | 1,8 | 40,3 | 0,2  | 1,2 | n.d. |
| 133 | Evian        | Natural mineral water | Evian-les-Bains | 376 |  | 7,27 |      | 6,5  | 1     | 80  | 26  | 360  | 12,6 | 6,8 | n.d. |

**Table S3:** References of IAEA-GNIP stations monitoring of rainwater.

|                      |                   |                                                                                                                                                                                                                                                                                                                                                                                                                                                                                                                                                                                                                                                                  |
|----------------------|-------------------|------------------------------------------------------------------------------------------------------------------------------------------------------------------------------------------------------------------------------------------------------------------------------------------------------------------------------------------------------------------------------------------------------------------------------------------------------------------------------------------------------------------------------------------------------------------------------------------------------------------------------------------------------------------|
| Italy_Wiser_BulkData | Project reference | <p>D'Alessandro W. et al. (2004): Oxygen isotope composition of natural waters in the Mt Etna area, in: Journal of Hydrology 296, 282-299.</p> <p>D'Amelio et al. (1994) Environmental isotope data: oxygen isotope concentration in precipitation in NE Italy (Friuli-Venezia Giulia). Miner. Petrogr. Acta, Vol. XXXVII 113-124.</p> <p>Paternoster M., Liotta M., Favara R. (2008): Stable isotope ratios in meteoric recharge and groundwater at Mt. Vulture volcano, southern Italy, in: Journal of Hydrology, Vol. 348, pp. 87-97</p> <p>[Partner: Radioactive Dating Laboratory, Frescati, Sweden]</p> <p>Oestlund et al. unknown year unknown title.</p> |
|----------------------|-------------------|------------------------------------------------------------------------------------------------------------------------------------------------------------------------------------------------------------------------------------------------------------------------------------------------------------------------------------------------------------------------------------------------------------------------------------------------------------------------------------------------------------------------------------------------------------------------------------------------------------------------------------------------------------------|

|  |                |                                                                                                                                                                                                                                                                                                                                                                                                                                                                                                                                                               |
|--|----------------|---------------------------------------------------------------------------------------------------------------------------------------------------------------------------------------------------------------------------------------------------------------------------------------------------------------------------------------------------------------------------------------------------------------------------------------------------------------------------------------------------------------------------------------------------------------|
|  |                | Cortecci G. Dinelli E. Mussi M. (2008): Isotopic composition and secondary evaporation effects on precipitation from the urban centre of Bologna, Italy, in: Periodico di Mineralogia, 77, 53-61. Meteo data partly from tutiempo.net                                                                                                                                                                                                                                                                                                                         |
|  | Site reference | [Partner: University "La Sapienza", Rome]<br>[Partner: University of Cagliari]<br>[Partner: INGV, Palermo], [Reference: D'Alessandro et al. 2004]<br>[Reference: D'Amelio et al. 1994]<br>[Reference: Paternoster et al. 2008]<br>[Partner: IGG-CNR, Pisa]<br>[Partner: INGV, Palermo]<br>[Partner: Geokarst, Trieste]<br>[Partners: n/a]<br>[Partner: University of Torino]<br>[Partner: University of Calabria]<br>[Partner: IAS-CNR, Porano]<br>[Partner: Universita Politecnica delle Marche, Ancona; IGG-CNR, Pisa]<br>[Reference: Cortecci et al. 2008] |

|                       |                   |                                                                                                                                                                    |
|-----------------------|-------------------|--------------------------------------------------------------------------------------------------------------------------------------------------------------------|
| Greece_Wiser_BulkData | Project reference | [Partner: Radioactive Dating Laboratory, Frescati, Sweden]<br>Oestlund et al. unknown year unknown title.                                                          |
|                       | Site reference    | [Partners: n/a]<br>[Partners: National Observatory, Athens; University of Patras]<br>[Partners: University of Patras]<br>[Partners: University of Patras; unknown] |

|                         |                   |                                                                                                                                                                                                                                                                                                                                                                                                                          |
|-------------------------|-------------------|--------------------------------------------------------------------------------------------------------------------------------------------------------------------------------------------------------------------------------------------------------------------------------------------------------------------------------------------------------------------------------------------------------------------------|
| Slovenia_Wiser_BulkData | Project reference | Vreca, P. et al.: Isotopic characteristics of precipitation in Slovenia and Croatia: Comparison of continental and maritime stations, in: Journal of Hydrology 330, p. 457-469 (2006). DOI: 10.1016/j.jhydrol.2006.04.005<br>Vreca, P. et al.: Isotopic composition of precipitation at the station Ljubljana (Reaktor), Slovenia – period 2007–2010, in: Geologija 57/2, 217-230 (2014). doi:10.5474/geologija.2014.019 |
|                         | Site reference    | [Partners: JSI, ARSO], [Reference: Vreca et al. 2006]<br>[Partners: JSI, ARSO], [Info: 1984-1992 @ ARSO, 1992-2000/08 @ JSI, 2000/09-present @ JSI Research Reactor Centre.], [Reference: Vreca et al. 2006, Vreca et al. 2014]                                                                                                                                                                                          |
| Austria_Wiser_BulkData  | Project reference | Rank, D. and W. Papesch: Isotopic composition of precipitation in Austria in relation to air circulation patterns and climate, in International Atomic Energy Agency: Isotopic composition of precipitation in the Mediterranean Basin in relation to air circulation patterns and climate (IAEA-TECDOC-1453), pp. 19-36 (2005).                                                                                         |
|                         | Site reference    | Partners: Zentralanstalt für Meteorologie und Geodynamik, Vienna; Arsenal Research, Vienna<br>Reference: Rank & Papesch 2005<br>[Partners: Bundesforschungs- und Versuchsanstalt Arsenal]                                                                                                                                                                                                                                |
| Croatia_Wiser_BulkData  | Site reference    | [Partner: University of Rijeka], [Reference: Hunjak et al. 2013]<br>[Partner: Ruder Boskovic Institute, Zagreb], [Reference: Vreca et al. 2006]<br>[Partner: Ruder Boskovic Institute, Zagreb]<br>[Partner: Ruder Boskovic Institute, Zagreb; Jozef Stefan Institute, Ljubljana], [Reference: Vreca et al. 2006]<br>[Partner: University of Rijeka]                                                                      |
| France_Wiser_BulkData   | Project reference | [Partner: Radioactive Dating Laboratory, Frescati, Sweden]<br>Oestlund et al. unknown year unknown title.                                                                                                                                                                                                                                                                                                                |

|  |                |                                                                                                                                                                                                                                                                                                                                                                                                                                                                                                                               |
|--|----------------|-------------------------------------------------------------------------------------------------------------------------------------------------------------------------------------------------------------------------------------------------------------------------------------------------------------------------------------------------------------------------------------------------------------------------------------------------------------------------------------------------------------------------------|
|  |                | Lambs, Moussa & Brunet 2013: Air Masses Origin and Isotopic Tracers: A Study Case of the Oceanic and Mediterranean Rainfall Southwest of France, Water 5 617-628<br>[Partner: MINES ParisTech]                                                                                                                                                                                                                                                                                                                                |
|  | Site reference | [Partners: n/a]<br>[Partner: Universite d'Avignon et des Pays de Vaucluse]<br>[Partners: Universite d'Avignon et des Pays de Vaucluse; Centre de Recherches Géodynamiques, Thonon; BRGM, Orleans]<br>[Partner: University of Toulouse], [Reference: Lambs, Moussa & Brunet 2013]<br>[Partner: BRGM, Orleans; Laboratoire d'Hydrologie et de Géochimie Isotopique, Orsay]<br>Partner: MINES ParisTech – PSL Research University - Centre de Géosciences, Fontainebleau<br>[Partner: BRGM, Orleans]<br>[Partner: INRA Bordeaux] |

Table S4: List of IAEA-GNIP stations monitoring rainwater and the considered operation periods (highlighted in yellow). In red the reference period in this article.

[illegible]

[illegible]

[illegible]

[illegible]

[illegible]

[illegible]

[illegible]
